# Supplementary material for: Organic flash memory on various flexible substrates for foldable and disposable electronics
Source: PubMed Central journal article supplement (PMC5620045; doi:10.1038/s41467-017-00805-z), 2017-09-28
Supplement: 41467_2017_805_MOESM3_ESM.pdf [file 41467_2017_805_MOESM3_ESM.pdf]

## **Description of Additional Supplementary Files**

File Name: Supplementary Movie 1

Description: Movie shows a 6  $\mu\text{m}$ -thick plastic substrate with organic flash memories.

File Name: Supplementary Movie 2

Description: Movie shows an organic flash memory on a 6  $\mu\text{m}$ -thick plastic substrate.
